# Supplementary material for: Biosorption behavior and mechanism of cadmium from aqueous solutions by Synechocystis sp. PCC6803
Source: Royal Society of Chemistry journal article supplement (doi:10.1039/d1ra02366g), 2021-01-01
Supplement: d1ra02366g1.pdf [file d1ra02366g1.pdf]

## Captions

Figure captions

**Fig. S1.** Effect of pH (a), temperature (b) and initial Cd<sup>2+</sup> concentration (c) and contact time (d) on adsorption by *Synechocystis* sp. PCC6803

**Fig. S2.** Desorption of biosorbents after Cd<sup>2+</sup> adsorption using different desorption solutions

Table captions

**Table S1** Fluorescence spectral parameters of EPS from *Synechocystis* sp. PCC6803 during different culture time exposure to Cd<sup>2+</sup>

**Table S2** Components and contents of exopolysaccharides before (a) and after (b) Cd<sup>2+</sup> adsorption

**Table S3** Characteristic peak wavenumber (cm<sup>-1</sup>) of FTIR before and after Cd<sup>2+</sup> adsorption

**Table S4** Binding energy and atomic contents from XPS before and after Cd<sup>2+</sup> adsorption on *Synechocystis* sp. PCC6803

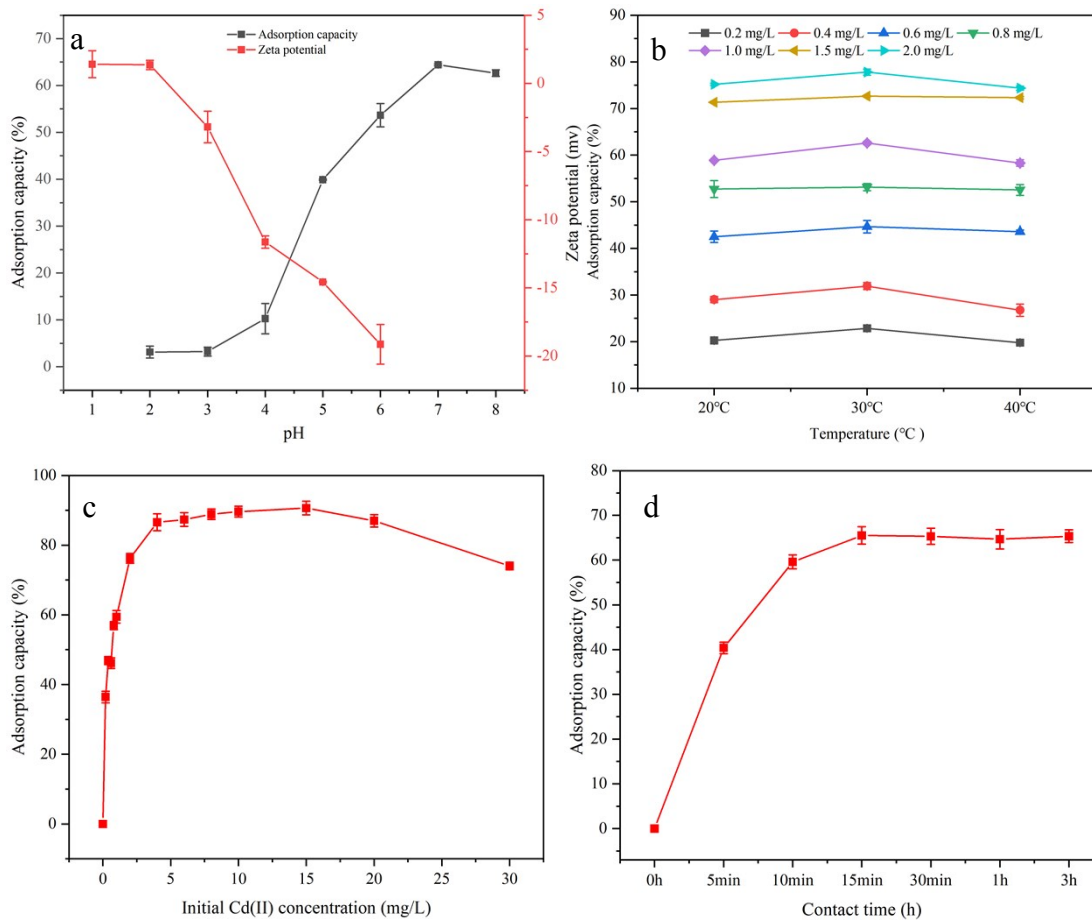

Fig. S1. Effect of pH (a), temperature (b) and initial Cd<sup>2+</sup> concentration (c) and contact time (d) on adsorption by *Synechocystis* sp. PCC6803

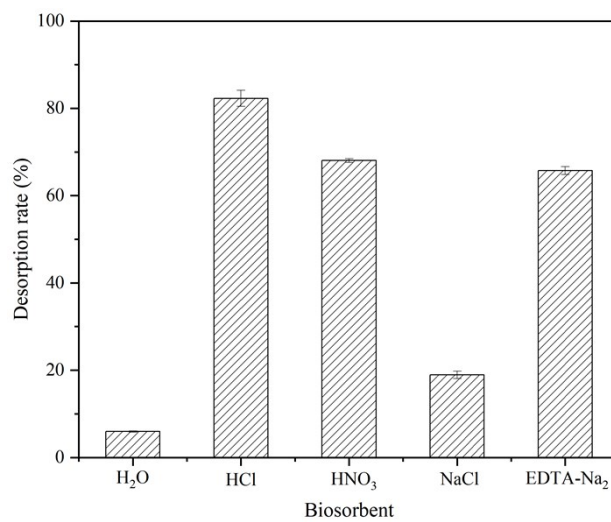

Fig. S2. Desorption of biosorbents after Cd<sup>2+</sup> adsorption using different desorption solutions

Table S1 Fluorescence spectral parameters of EPS from *Synechocystis* sp. PCC6803 during different  
 cluture time exposure to Cd<sup>2+</sup>

| 1.0 mg/L sample | Peaks | Ex/Em(nm)   | Intensity | Corresponding peaks |
|-----------------|-------|-------------|-----------|---------------------|
| Control-EPS     | A     | 270.0/460.0 | 718.4     | Humic acid -like    |
|                 | B     | 360.0/460.0 | 411.0     | Humic acid          |
|                 | C     | 280.0/350.0 | 189.9     | Tryptophan          |
|                 | D     | 230.0/340.0 | 56.45     | Tyrosine            |
| 15 min-EPS      | A     | 260.0/460.0 | 1000      | Humic acid -like    |
|                 | B     | 360.0/460.0 | 548.3     | Humic acid          |
|                 | C     | 280.0/340.0 | 171.0     | Tryptophan          |
|                 | D     | 230.0/330.0 | 82.12     | Tyrosine            |
| 24 h-EPS        | A     | 270.0/460.0 | 1003      | Humic acid -like    |
|                 | B     | 360.0/460.0 | 577.9     | Humic acid          |
|                 | C     | 280.0/360.0 | 198.0     | Tryptophan          |
|                 | D     | 220.0/330.0 | 115.5     | Tyrosine            |
| 48 h-EPS        | A     | 280.0/450.0 | 1208      | Humic acid -like    |
|                 | B     | 360.0/460.0 | 562.7     | Humic acid          |
|                 | C     | 280.0/360.0 | 193.1     | Tryptophan          |
|                 | D     | 230.0/320.0 | 149.8     | Tyrosine            |
| 72 h-EPS        | A     | 280.0/450.0 | 1494      | Humic acid -like    |
|                 | B     | 350.0/450.0 | 538.4     | Humic acid          |
|                 | C     | 280.0/360.0 | 193.0     | Tryptophan          |
|                 | D     | 220.0/330.0 | 174.1     | Tyrosine            |
| 96 h-EPS        | A     | 280.0/460.0 | 1003      | Humic acid -like    |
|                 | B     | 350.0/460.0 | 352.0     | Humic acid          |
|                 | C     | 280.0/380.0 | 170.6     | Tryptophan          |
|                 | D     | 220.0/340.0 | 177.9     | Tyrosine            |
|                 | E     | 320.0/380.0 | 173.5     | Humic acid-like     |

Table S2 Components and contents of exopolysaccharides before (a) and after (b) Cd<sup>2+</sup> adsorption

| Name   | Cyanobacteria |           |                | Cyanobacteria with Cd <sup>2+</sup> |           |                |
|--------|---------------|-----------|----------------|-------------------------------------|-----------|----------------|
|        | Time          | Peak area | Content (mg/L) | Time                                | Peak area | Content (mg/L) |
| Fuc    | 4.359         | 0.693     | 3.62           | 4.375                               | 0.622     | 3.25           |
| GalN   | 8.2           | 1.478     | 3.78           | 8.234                               | 1.275     | 3.26           |
| Rha    | 8.709         | 0.29      | 2.59           | 8.725                               | 0.397     | 3.54           |
| Ara    | 9.35          | 0.487     | 2.33           | 9.367                               | 1.025     | 4.90           |
| GlcN   | 10.35         | 2.312     | 4.21           | 10.384                              | 2.183     | 3.98           |
| Gal    | 11.725        | 3.159     | 18.90          | 11.842                              | 4.255     | 25.46          |
| Glc    | 13.35         | 6.275     | 108.23         | 13.45                               | 6.040     | 104.17         |
| GlcNAc | 14.859        | 0         | 0.00           | 14.859                              | 0         | 0.00           |
| Xyl    | 15.717        | 0.721     | 3.95           | 15.809                              | 0.629     | 3.45           |
| Man    | 16.384        | 0.481     | 4.96           | 16.6                                | 0.519     | 5.35           |
| Fru    | 22.025        | 0         | 0.00           | 22.025                              | 0         | 0.00           |
| Rib    | 27.475        | 0         | 0.00           | 27.475                              | 0         | 0.00           |
| GalA   | 42.142        | 0.201     | 2.18           | 42.059                              | 0.468     | 5.06           |
| GulA   | 42.509        | 0         | 0.00           | 42.509                              | 0         | 0.00           |
| GlcA   | 44.609        | 0.112     | 1.36           | 44.417                              | 0.139     | 1.69           |
| ManA   | 46.675        | 0         | 0.00           | 46.675                              | 0         | 0.00           |

Table S3 Characteristic peak wavenumber (cm<sup>-1</sup>) of FTIR before and after Cd<sup>2+</sup> adsorption

| Time    | OH      | CH      | CONH    | NH      | CH      | C=O     | PO <sup>2-</sup> | C-O-C   |
|---------|---------|---------|---------|---------|---------|---------|------------------|---------|
| control | 3314.99 | 2928.42 | 1654.60 | 1544.25 | -       | 1403.68 | 1251.27          | 1056.35 |
| 15 min  | 3317.15 | 2928.54 | 1654.03 | 1543.81 | -       | 1403.90 | 1244.96          | 1053.03 |
| 24 h    | 3315.98 | 2927.46 | 1654.91 | 1543.45 | -       | 1403.18 | 1244.26          | 1042.83 |
| 48 h    | 3317.16 | 2927.67 | 1655.32 | 1543.12 | 1453.01 | 1400.89 | 1243.57          | 1038.06 |
| 72 h    | 3305.22 | 2927.31 | 1655.20 | 1543.38 | 1452.58 | 1399.16 | 1242.78          | 1079.71 |
| 96 h    | 3305.51 | 2927.63 | 1655.36 | 1542.76 | 1452.38 | 1398.17 | 1242.53          | 1079.71 |

Table S4 Binding energy and atomic contents from XPS before and after Cd<sup>2+</sup> adsorption on

*Synechocystis* sp. PCC6803

| Element | Assignment       | Be (eV)           | Atomic (%) | Be (eV)          | Atomic (%) |
|---------|------------------|-------------------|------------|------------------|------------|
|         |                  | Before adsorption |            | After adsorption |            |
| C 1s    | C-C              | 283.15            | 62.65      | 283.14           | 66.94      |
|         | C-O              | 284.65            | 18.01      | 284.67           | 15.90      |
|         | C=O              | 286.22            | 19.34      | 286.19           | 17.16      |
| O 1s    | C=O              | 529.51            | 37.76      | 529.51           | 29.53      |
|         | C-OH             | 530.23            | 39.82      | 530.26           | 41.41      |
|         | C-O              | 531.04            | 22.42      | 531.06           | 29.06      |
| N 1s    | -NH              | 398.23            | 75.68      | 398.22           | 86.68      |
|         | -NH <sub>2</sub> | 398.35            | 24.32      | 403.41           | 13.32      |
